# Supplementary material for: HLA Expression Correlates to the Risk of Immune Checkpoint Inhibitor-Induced Pneumonitis
Source: MDPI journal article supplement (doi:10.3390/cells9091964), 2020-08-25
Supplement: s1 [file s1]

**Table S1.** IRP correlation with blood inflammatory markers. AAbs rise as well as homozygosis status in germline HLA A, B, C and DRB1 alleles did not correlate with IRP rate.

|              | IRP | N   | Avg    | Std Dev | P-value |
|--------------|-----|-----|--------|---------|---------|
| <b>Neutr</b> | No  | 137 | 5.43   | 3.14    | 0.16    |
|              | Yes | 26  | 4.50   | 2.49    |         |
| <b>Lymph</b> | No  | 137 | 1.79   | 1.54    | 0.27    |
|              | Yes | 25  | 1.44   | 0.51    |         |
| <b>NLR</b>   | No  | 133 | 4.38   | 4.96    | 0.38    |
|              | Yes | 25  | 3.49   | 2.26    |         |
| <b>MON</b>   | No  | 137 | 0.75   | 0.39    | 0.32    |
|              | Yes | 26  | 0.66   | 0.30    |         |
| <b>EOS</b>   | No  | 137 | 0.13   | 0.15    | 0.94    |
|              | Yes | 26  | 0.14   | 0.14    |         |
| <b>CRP</b>   | No  | 106 | 25.66  | 42.21   | 0.16    |
|              | Yes | 22  | 12.60  | 19.75   |         |
| <b>ESR</b>   | No  | 94  | 46.02  | 34.12   | 0.98    |
|              | Yes | 21  | 46.19  | 25.42   |         |
| <b>LDH</b>   | No  | 126 | 462.95 | 277.66  | 0.09    |
|              | Yes | 24  | 362.04 | 209.25  |         |

Neutr: neutrophils, Lymph: lymphocytes, NLR: neutrophil to lymphocyte ratio, MON: monocytes, EOS: eosinophils, CRP: C-reactive Protein, ESR: erythrocyte sedimentation rate, LDH: lactate dehydrogenase, IRP: immune-related pneumonitis, N: number of patients enrolled for the analysis, Avg: average values, Std Dev: standard deviation of the values.
